# Supplementary material for: GLP-1R Responsiveness Predicts Individual Gastric Bypass Efficacy on Glucose Tolerance in Rats
Source: Oxford University Press journal article supplement (doi:10.2337/db13-0511), 2013-11-02

# SUPPLEMENTARY DATA

**Supplementary Figure 1.** Replication of Ex4 Response: Relative (a) body weight response to 50  $\mu\text{g/kg/day}$  Ex4 treatment in DIO Long-Evans rats. Final *ad libitum* blood glucose (b), *ad libitum* blood glucose change (c) and food intake (d) of responders and non-responders identified by body weight during the 5 d treatment. All data obtained in male Long-Evans rats maintained on HFD (40% butter-fat) for 10 weeks.  $n = 197$  for total (triangles) and 30 for both responder (circles) and non-responder (squares) groups. All data are represented as mean  $\pm$  SEM. \* $p < 0.05$ , \*\* $p < 0.01$ , \*\*\* $p < 0.001$ .

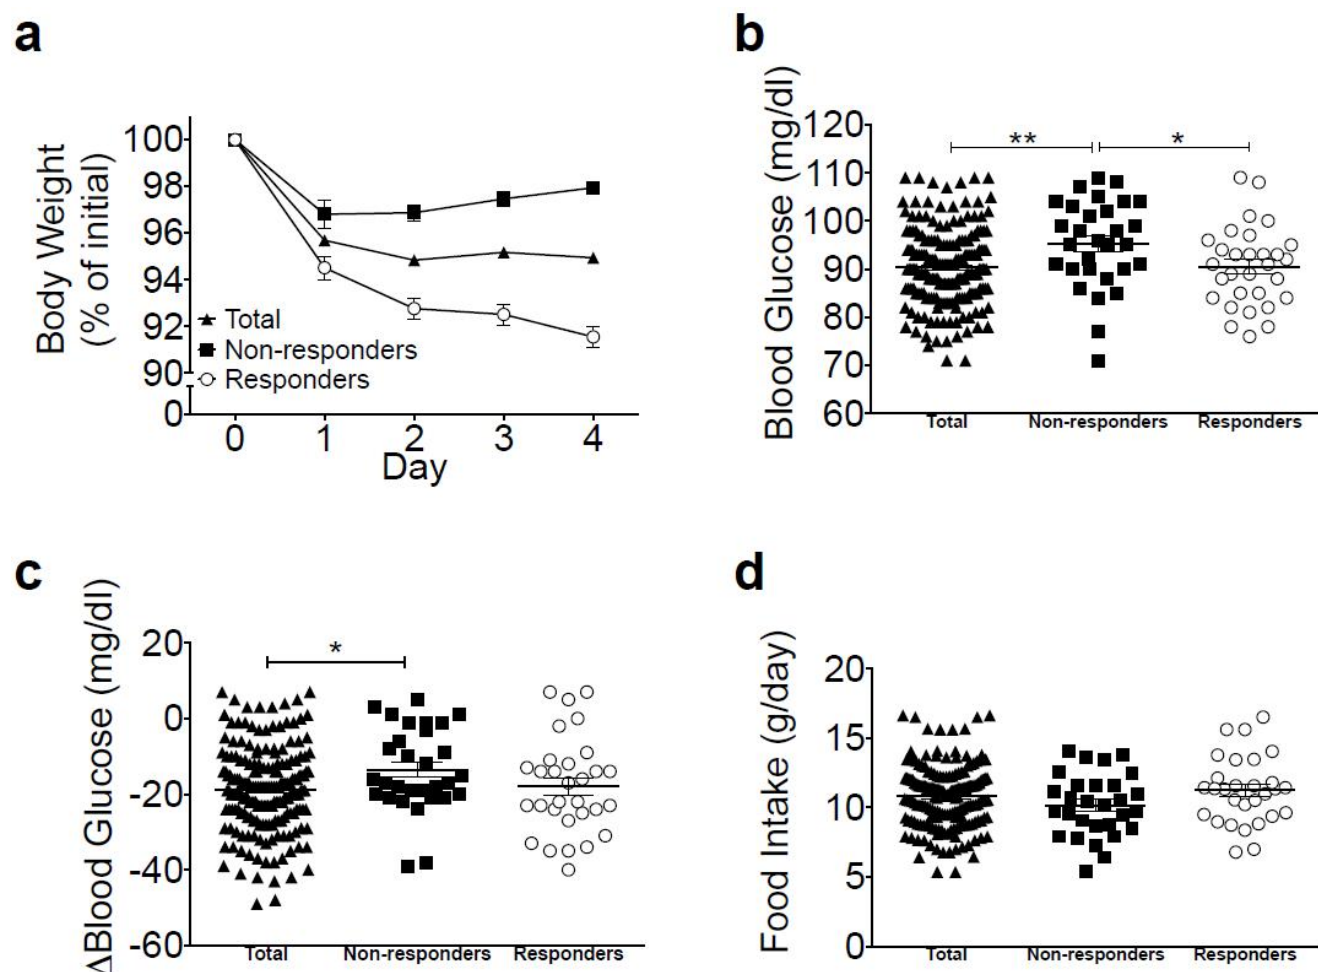

**Supplementary Figure 2.** Relative (a) BW loss, food intake (b), and *ad libitum* blood glucose change (c) in response to Ex4 as correlated to initial BW for each individual rat. All data obtained in male Long-Evans rats maintained on HFD (40% butter-fat) for 8 weeks. n= 197 for all rats (black triangles) and 30 for both responder (red circles) and non-responder (blue squares) groups. Lines denote linear regression analysis of corresponding groups.

**a**

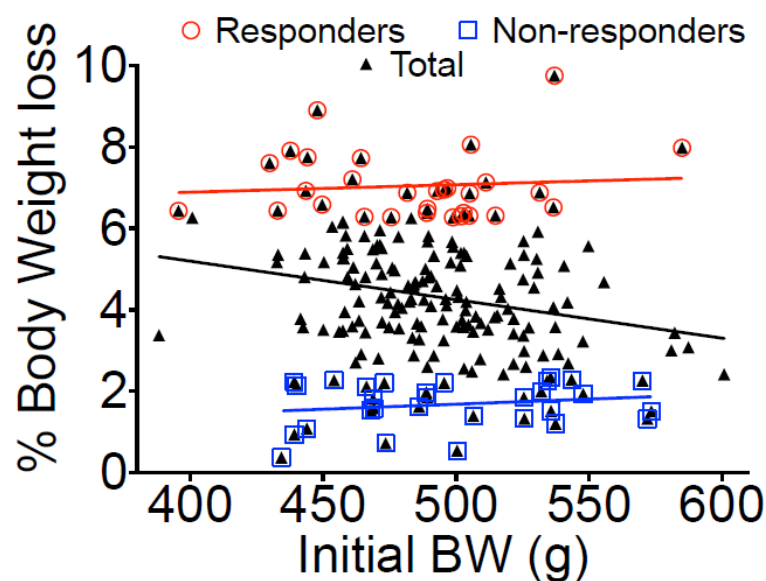

**b**

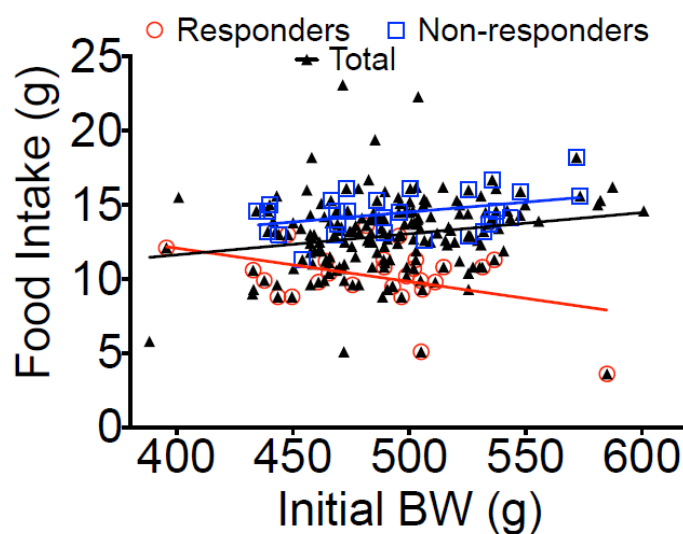

**C**

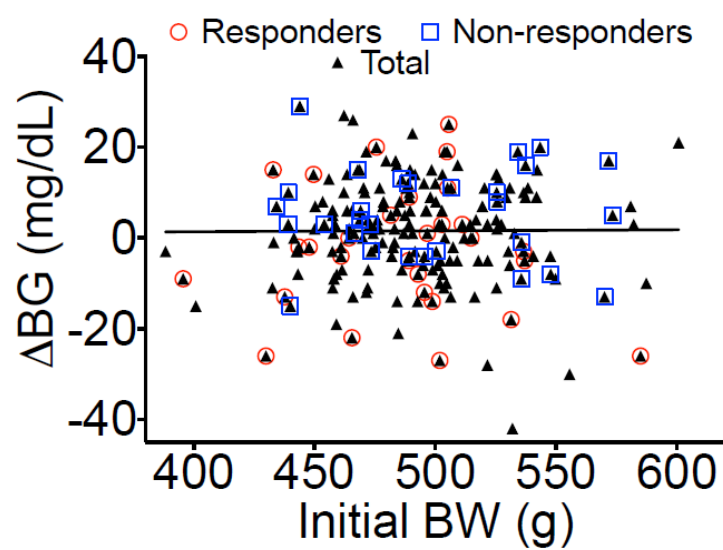

Supplement: db130511supplementarydata.pdf [file db130511supplementarydata.pdf]
